# Supplementary material
Source: PubMed Central journal article supplement (PMC6005657)
Supplement: NIHMS465308-supplement-Supplementry_data.pdf [file NIHMS465308-supplement-Supplementry_data.pdf]

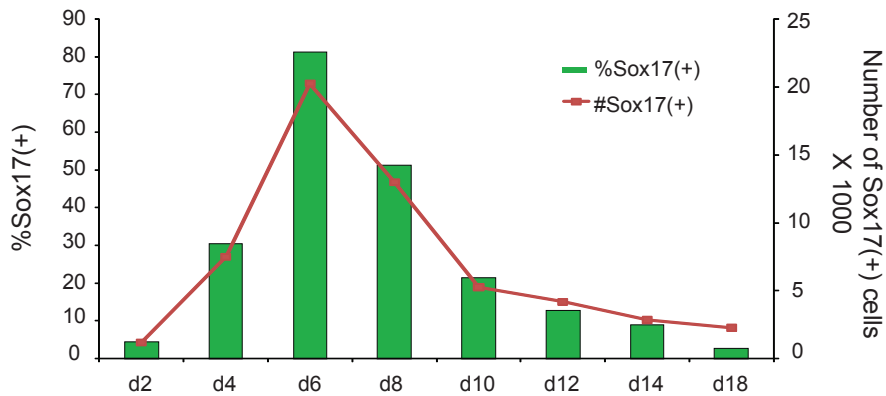

Supplementary Figure 1: Expression of Sox17-GFP is transient during directed differentiation, with the peak at day six. Definitive endoderm (Sox17(+)) was generated from mES cells containing a Sox17-GFP reporter using growth factors (ActivinA and Wnt3A) for six days. Progenitors are the definitive endoderm stage can thus be captured using GFP expression. Data are shown for cells differentiated on gelatin.

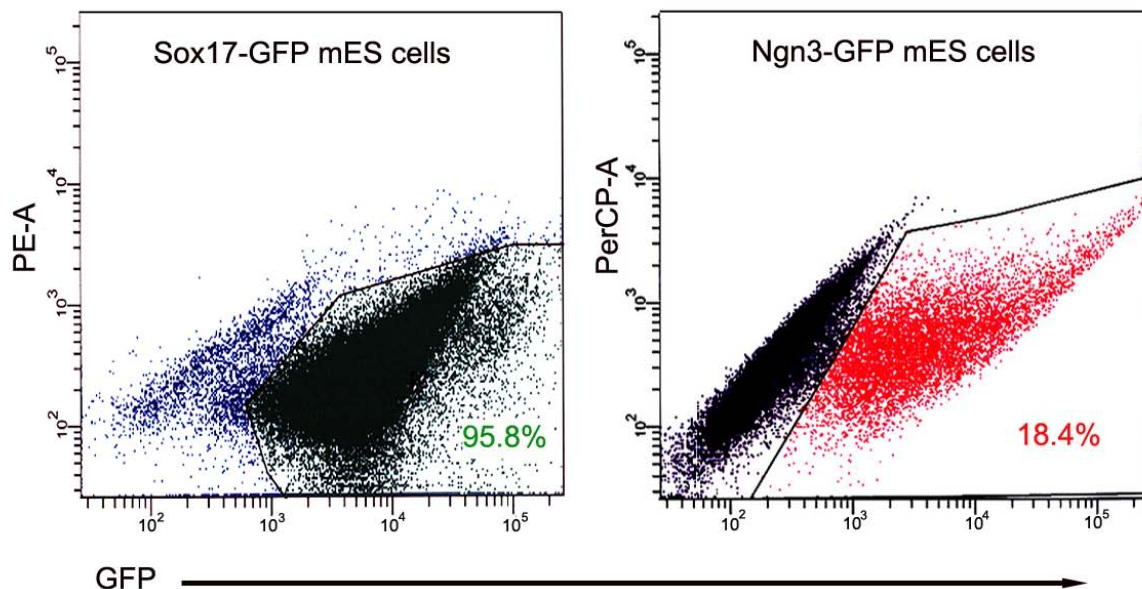

Supplementary Figure 2: Flow cytometric quantification and purification of mES derived Sox17-GFP(+) and Ngn3GFP(+) populations.

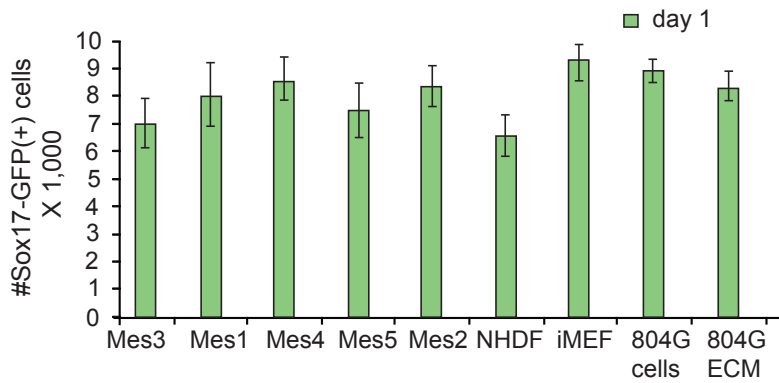

Supplementary Figure 3: No significant differences are found in the initial attachment of endoderm to mesenchyme versus controls. FACS-purified Sox17-GFP(+) cells were plated onto various surfaces and then their numbers were quantitated one day later.

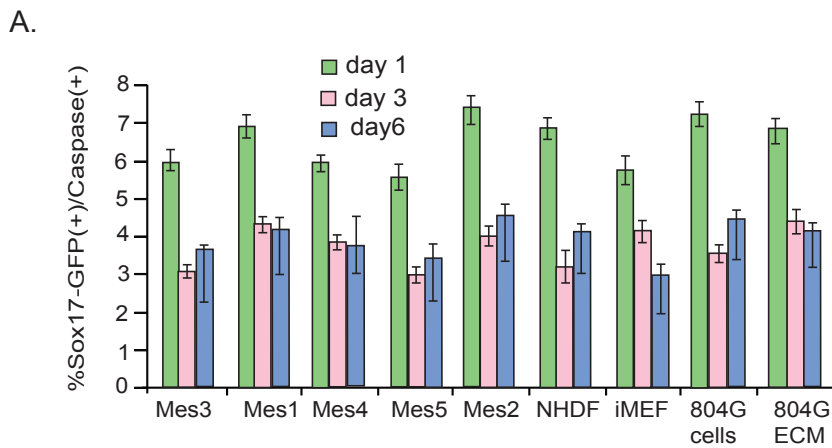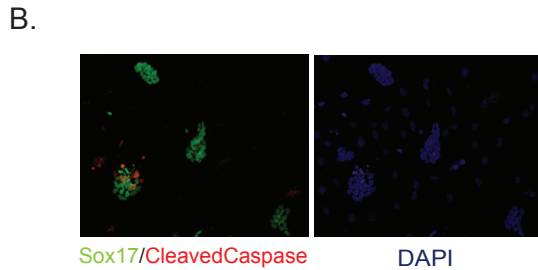

Supplementary Figure 4: Mes1 and Mes2 do not prevent apoptosis. A. Quantitation of immunofluorescence staining for cleaved caspase 3, a marker of cells undergoing apoptosis, revealed that Sox17-GFP(+) cells expanded on mesenchyme do not undergo increased apoptosis. Error bars were calculated using standard deviation. B. Representative images showing Sox17-GFP/cleaved caspase 3 immunofluorescence.

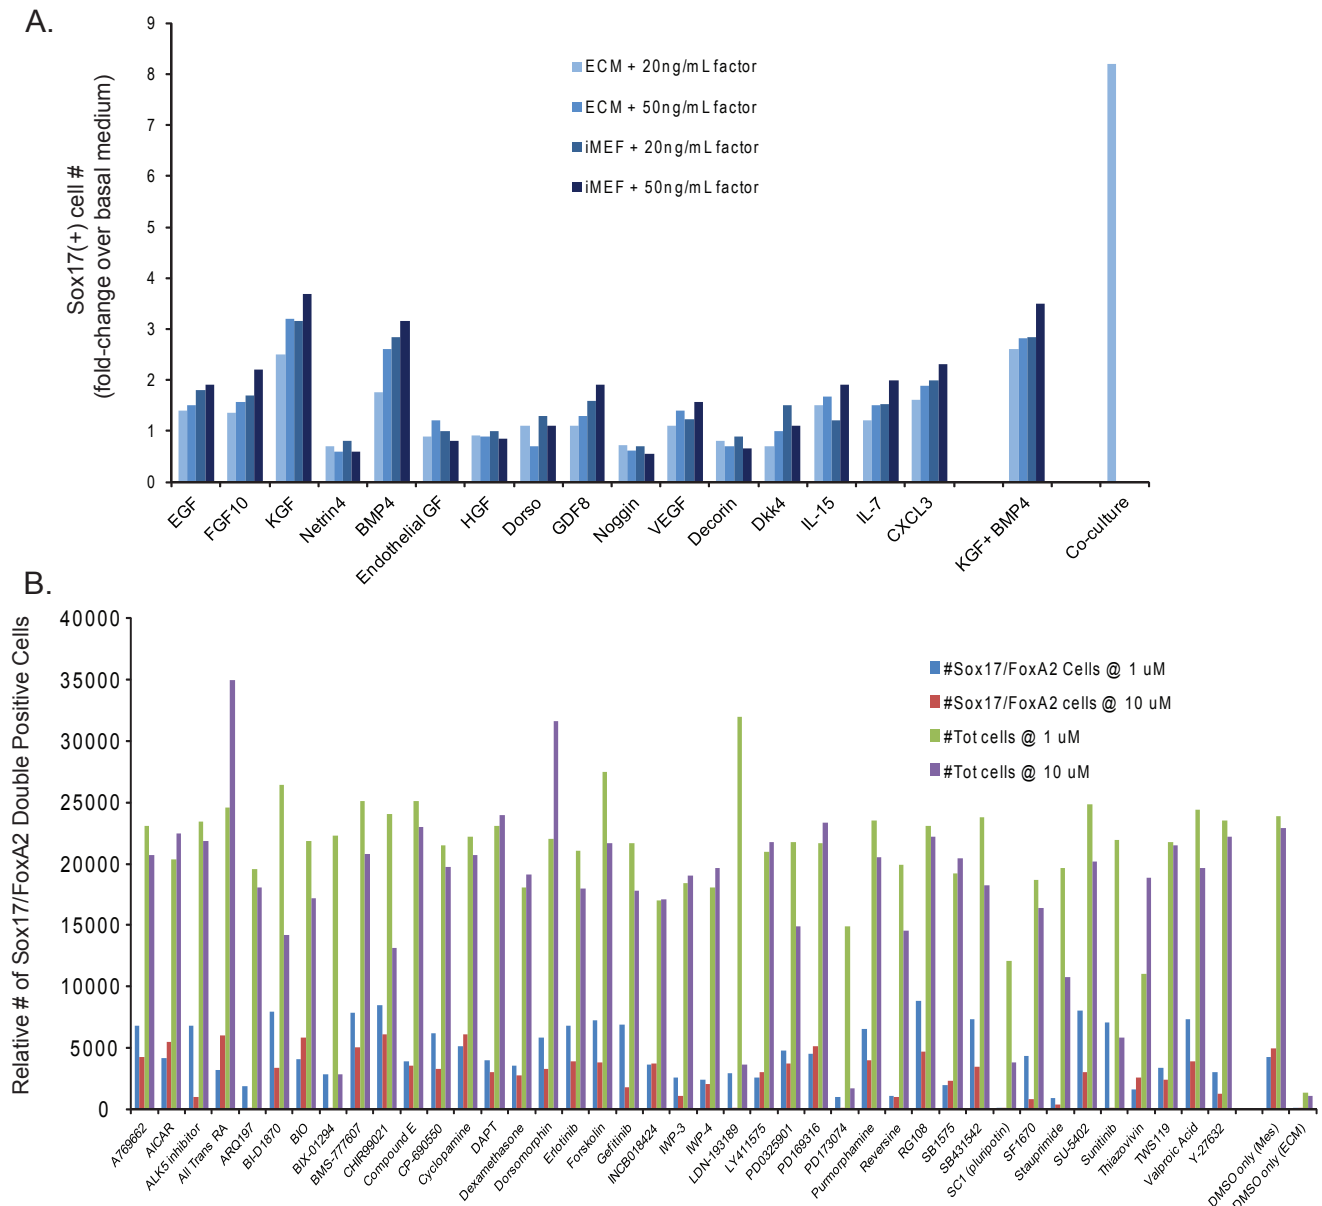

Supplementary Figure 5: Growth factor and chemical inhibitor screens. A. Growth factor screen. FACS-purified, mouse Sox17-GFP(+) cells were cultured on either ECM or on iMEF (to provide a cellular context). A panel of candidate signaling factors were screened for the ability to expand endoderm at two different concentrations. The number of Sox17-GFP(+) cells was quantitated by FACS after 6 days of treatment, and is represented as fold-change over basal medium alone. Some factors had a marginal effect, 1.5- to 2-fold more Sox17-GFP(+) cells compared to basal medium alone. Even after 6 days of treatment with Keratinocyte Growth Factor (KGF) or Bone Morphogenetic Protein 4 (BMP4), only a 3-fold increase was seen (about 40% of the effect provided by co-culture mediated expansion), with no additive effect observed when used in combination. B. Chemical compound screen. Human endoderm was cultured with Mes2, and starting the next day a panel of 41 chemical inhibitors were added to see if the co-culture-mediated expansion could be abrogated. Chemicals were added at 1 uM and 10 uM over the course of 6 days. At day 6, cells were fixed, stained for Sox17 and FoxA2, and imaged and analyzed using high-throughput imaging machinery and software. Since some compounds may be toxic to endoderm, to mesenchyme, or to both, we quantitated both the total cell number as well as the number of cells that were positive for both Sox17 and FoxA2. As negative and positive controls, cells were cultured on ECM in the presence of DMSO, and on mesenchyme in the presence of DMSO, respectively.

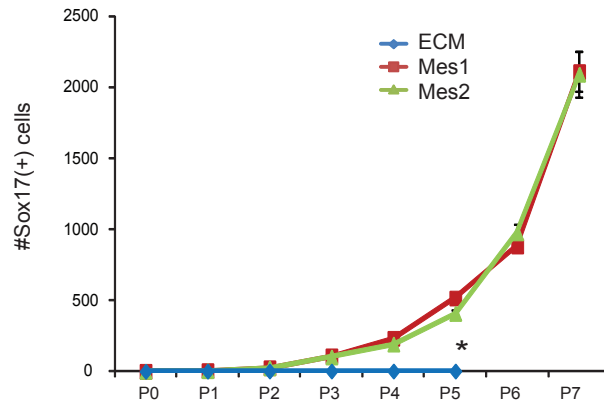

Supplementary Figure 6: Long-term expansion of mouse endoderm with successive FACS sorting yields expansion of approximately 2,000-fold more cells on Mes1 and Mes2. After seven passages, lasting 42 days, we observed a 2,000-fold expansion of purified mouse endoderm progenitors when the Sox17(+) cells were purified by FACS at each successive passage. The percentage of Sox17(+) cells at each stage remained steady (between 77% and 87%, data not shown.) In contrast to Sox17(+) cells passaged on mesenchyme, cells cultured on ECM alone were progressively lost within 5 passages (asterisk). As FACS sorting can be harsh to cells, we observed significant loss at each passage.

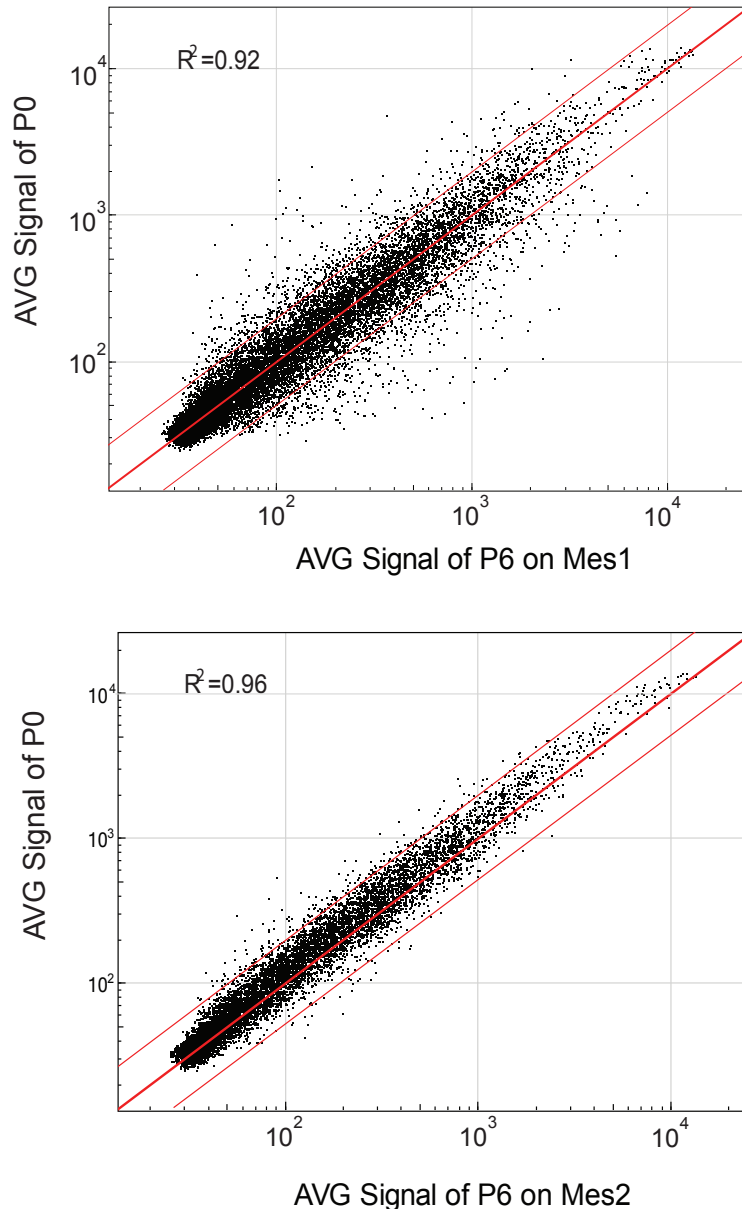

Supplementary Figure 7: A scatter plot showing the average signal of all genes expressed by unpassaged endoderm (P0, y axis) versus those expressed by endoderm after 6 passages on mesenchyme Mes1 or Mes2 (P6, x axis). Sorted mouse endoderm that was unpassaged (P0) or passaged for 6 times on Mes1 or Mes2 (P6) was compared by global gene expression analysis. The concordance is quite high between P0 endoderm and P6 endoderm on Mes1 ( $R^2 = 0.92$ ), and similarly between P0 and P6 on Mes2 ( $R^2 = 0.96$ ). Red lines indicate the level for 2-fold differences between genes. As a reference, our lab previously reported that the  $R^2$  value for FACS-purified Sox17(+) cells from E7.75 mouse embryos vs. untreated mES cells was 0.55.<sup>1</sup>

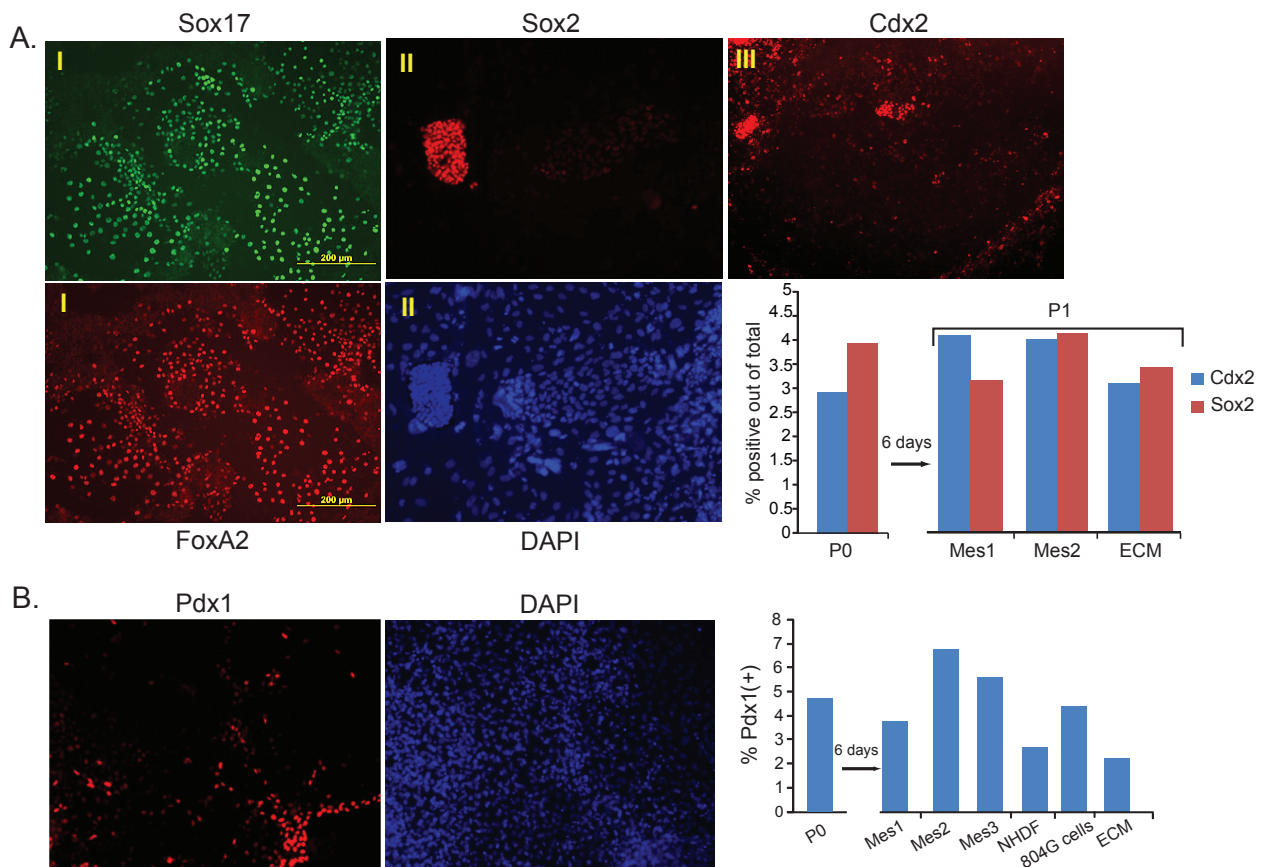

Supplementary Figure 8: Characterization of endoderm expanded by mesenchymal signals. A. Expression of endodermal markers. I. The majority (>95%) of Sox17(+) cells also express the transcription factor FoxA2. In contrast, the expression of Sox2 (which marks lung lineage commitment, panel II) or of Cdx2 (a marker of gut endoderm, panel III) are rare; the incidence is 3% and 4% of cells, respectively, and this does not markedly increase during mesenchyme-mediated expansion. The quantification of Cdx2 and Sox2 is shown as the percentage of Sox17(+) cells. B. Endoderm cultured in the presence of Mes1 or Mes2 does not spontaneously differentiate into Pdx1(+) pancreatic progenitors. After six days of expansion 3.5% (on Mes1) and 6.8% (Mes2) of all cells express Pdx1 compared to 3.1% of cells cultured on ECM. The percentage of total cells is shown.

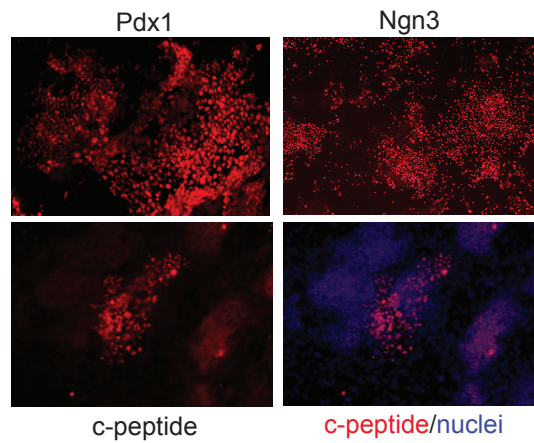

Supplementary Figure 9: Mouse endoderm passaged 6 times (P6) on Mes2 can be further differentiated to pancreatic progenitors (Pdx1(+)), endocrine progenitors (Ngn3(+)), and c-peptide-expressing cells.



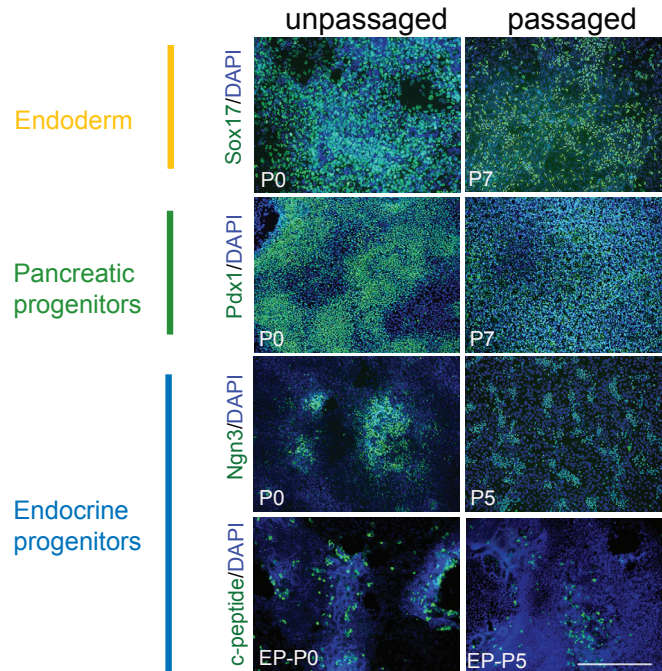

Supplementary Figure 10: Immunofluorescence of unpassaged or passaged cells, at each pancreatic stage, shows the expression of expected markers before injection into the kidney capsule. Cells were differentiated and expanded in vitro, then stained to ensure proper differentiation before transplantation. Endoderm (P0 and P7) was stained for Sox17, pancreatic progenitors (P0 and P7) were stained for Pdx1, and endocrine progenitors (P0 and P5) were stained for Ngn3 and for c-peptide. Even at the latest stage (endocrine progenitors), few cells express c-peptide before injection and maturation in vivo. Images were taken at 10X magnification.



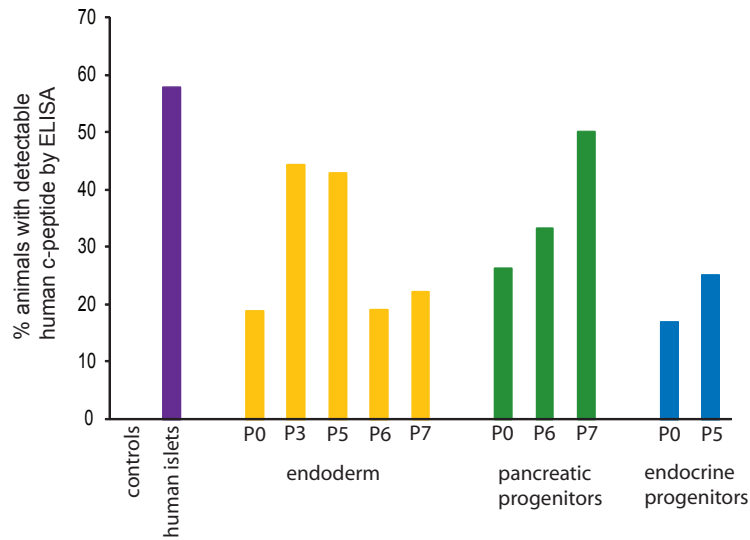

Supplementary Figure 11: Human c-peptide is detectable in the plasma of animals that have received transplants containing both unpassaged and passaged endoderm, pancreatic progenitors, and endocrine progenitors. Graph depicts a summary of each stage of progenitors that was injected, and what percentage of animals receiving those cells showed detectable human c-peptide by ultrasensitive ELISA (where detectable was defined as greater than 15 pmol/L). No c-peptide was detected in animals that received negative controls (in which PBS alone, or mesenchyme alone were injected). As a positive control for engraftment, survival, and function, human islets were also injected.

| <b>Primary Mesenchymal Cell Lines</b> | <b>Developmental Stage</b>                             | <b>Species</b> | <b>Organ of Origin</b>     |
|---------------------------------------|--------------------------------------------------------|----------------|----------------------------|
| Mes1                                  | E18.5                                                  | Mouse          | Pancreas                   |
| Mes2                                  | Adult                                                  | Mouse          | Pancreas (islet fraction)  |
| Mes3                                  | Adult                                                  | Human          | Pancreas (islet fraction)  |
| Mes4                                  | E13.5                                                  | Mouse          | Pancreas                   |
| Mes5                                  | E12.5                                                  | Mouse          | Pancreas                   |
| Mes6                                  | Adult                                                  | Human          | Pancreas (islet fraction)  |
| Mes7                                  | Adult                                                  | Human          | Pancreas (islet fraction)  |
| Mes8                                  | E14.5                                                  | Mouse          | Pancreas                   |
| Mes9                                  | Adult                                                  | Human          | Pancreas (acinar fraction) |
| Mes10                                 | E15.5                                                  | Mouse          | Pancreas                   |
| Mes11                                 | E16.5                                                  | Mouse          | Pancreas                   |
| Mes12                                 | E17.5                                                  | Mouse          | Pancreas                   |
| Mes13                                 | E17.5                                                  | Mouse          | Pancreas                   |
| Mes14                                 | E17.5                                                  | Mouse          | Intestine                  |
| Mes15                                 | E17.5                                                  | Mouse          | Liver                      |
| Mes16                                 | P0                                                     | Mouse          | Spleen                     |
|                                       |                                                        |                |                            |
| <b>Control Cell Lines</b>             | <b>Description</b>                                     | <b>Species</b> | <b>Organ of Origin</b>     |
| C1: Endo                              | bEnd.3                                                 | Mouse          | Brain                      |
| C2: Endo                              | MS1 VEGF                                               | Mouse          | Pancreas (islet)           |
| C3: Epith                             | 804G (rat carcinoma cell line)                         | Rat            | Bladder                    |
| C4: Fibro                             | Normal Human Dermal Fibroblasts (NHDF)                 | Human          | Skin                       |
| C5: MEF                               | Mouse embryonic fibroblasts (MEF)                      | Mouse          | E12.5 embryo               |
|                                       |                                                        |                |                            |
| <b>Extracellular Matrices</b>         | <b>Description</b>                                     | <b>Species</b> | <b>Organ of Origin</b>     |
| ECM1                                  | Conditioned medium from 804G cell line (rat carcinoma) | Rat            | Bladder                    |
| ECM2                                  | Gelatin                                                |                |                            |
| ECM3                                  | Laminin                                                |                |                            |

Supplementary Table 1: A list of cells and ECM used in the screen. 16 primary mesenchymal lines were derived from mouse and human tissue. Mesenchyme from mouse was dissected from embryonic (days 12.5 through 18.5 after fertilization), neonatal (Postnatal day 0 (P0)) or adult mouse tissues. Mesenchyme from normal human adult donors was derived from the islet or acinar fractions alone.

**Supplementary Table 2: Summary of human ES-derived pancreatic cells injected into animals**

| Group            | Internal ID# | Source        | Age    | Material injected | Cautery ? | vol (ul) injected | method injection | Included in GTT (Fig. 4c)? | T0 c-peptide (pmol/L) (Fig. 4d) | T45 c-peptide (pmol/L) (Fig. 4d) |
|------------------|--------------|---------------|--------|-------------------|-----------|-------------------|------------------|----------------------------|---------------------------------|----------------------------------|
| <b>Control 1</b> | 738          | Charles River | ~7 wks | mesenchyme only   | Y         | 30                | syringe          |                            |                                 |                                  |
| 2                | 721          | Charles River | ~7 wks | mesenchyme only   | Y         | 30                | syringe          |                            |                                 |                                  |
| 3                | 746          | Charles River | ~7 wks | mesenchyme only   | Y         | 50                | syringe          |                            |                                 |                                  |
| 4                | 762          | Charles River | ~7 wks | mesenchyme only   | Y         | 50                | syringe          |                            |                                 |                                  |
| 5                | 740          | Charles River | ~7 wks | mesenchyme only   | Y         | 50                | syringe          |                            |                                 |                                  |
| 6                | 768          | Charles River | ~7 wks | mesenchyme only   | Y         | 50                | syringe          |                            |                                 |                                  |
| 7                | 715          | Charles River | ~7 wks | mesenchyme only   | Y         | 30                | syringe          |                            |                                 |                                  |
| 8                | 716          | Charles River | ~7 wks | mesenchyme only   | N         | 30                | syringe          | Yes                        | 5.8                             | 9.8                              |
| 9                | 717          | Charles River | ~7 wks | mesenchyme only   | Y         | 30                | syringe          |                            |                                 |                                  |
| 10               | 718          | Charles River | ~7 wks | mesenchyme only   | Y         | 30                | syringe          | Yes                        | 0.7                             | 6.8                              |
| 11               | 719          | Charles River | ~7 wks | mesenchyme only   | Y         | 30                | syringe          | Yes                        | 1.6                             | 0.4                              |
| 12               | 724          | Charles River | ~7 wks | mesenchyme only   | Y         | 30                | syringe          |                            |                                 |                                  |
| 13               | 725          | Charles River | ~7 wks | mesenchyme only   | Y         | 30                | syringe          |                            |                                 |                                  |
| 14               | 726          | Charles River | ~7 wks | mesenchyme only   | Y         | 30                | syringe          |                            |                                 |                                  |
| 15               | 728          | Charles River | ~7 wks | mesenchyme only   | Y         | 30                | syringe          |                            |                                 |                                  |
| 16               | 736          | Charles River | ~7 wks | mesenchyme only   | Y         | 30                | syringe          |                            |                                 |                                  |
| 17               | 737          | Charles River | ~7 wks | mesenchyme only   | Y         | 30                | syringe          | Yes                        | 0.6                             | 1.6                              |
| 18               | 739          | Charles River | ~7 wks | mesenchyme only   | Y         | 30                | syringe          |                            |                                 |                                  |
| 19               | 982          | Harlan        | ~7 wks | saline            | Y         | 50                | syringe          | Yes                        | 3.8                             | 0.9                              |
| 20               | 983          | Harlan        | ~7 wks | saline            | Y         | 50                | syringe          | Yes                        | 2.5                             | 2.0                              |
| 21               | 991          | Harlan        | ~7 wks | saline            | Y         | 50                | syringe          | Yes                        | 4.4                             | 8.0                              |
| 22               | 700          | Charles River | ~7 wks | saline            | Y         | 30                | pipetteman       |                            |                                 |                                  |
| 23               | 701          | Charles River | ~7 wks | saline            | Y         | 30                | pipetteman       |                            |                                 |                                  |
| 24               | 702          | Charles River | ~7 wks | saline            | N         | 30                | pipetteman       |                            |                                 |                                  |
| 25               | 703          | Charles River | ~7 wks | saline            | N         | 30                | pipetteman       |                            |                                 |                                  |
| <b>Endo P0 1</b> | 704          | Charles River | ~7 wks | hES-endoderm P0   | Y         | 30                | pipetteman       |                            |                                 |                                  |
| 2                | 705          | Charles River | ~7 wks | hES-endoderm P0   | Y         | 30                | pipetteman       |                            |                                 |                                  |
| 3                | 706          | Charles River | ~7 wks | hES-endoderm P0   | Y         | 30                | pipetteman       |                            |                                 |                                  |

|                  |     |               |        |                 |   |    |            |  |  |  |
|------------------|-----|---------------|--------|-----------------|---|----|------------|--|--|--|
| 4                | 707 | Charles River | ~7 wks | hES-endoderm P0 | Y | 30 | pipetteman |  |  |  |
| 5                | 709 | Charles River | ~7 wks | hES-endoderm P0 | Y | 30 | pipetteman |  |  |  |
| 6                | 710 | Charles River | ~7 wks | hES-endoderm P0 | Y | 30 | pipetteman |  |  |  |
| 7                | 711 | Charles River | ~7 wks | hES-endoderm P0 | Y | 30 | pipetteman |  |  |  |
| 8                | 712 | Charles River | ~7 wks | hES-endoderm P0 | Y | 30 | pipetteman |  |  |  |
| 9                | 713 | Charles River | ~7 wks | hES-endoderm P0 | Y | 30 | pipetteman |  |  |  |
| 10               | 784 | Harlan        | ~7 wks | hES-endoderm P0 | N | 50 | syringe    |  |  |  |
| 11               | 786 | Harlan        | ~7 wks | hES-endoderm P0 | N | 50 | syringe    |  |  |  |
| 12               | 787 | Harlan        | ~7 wks | hES-endoderm P0 | N | 50 | syringe    |  |  |  |
| 13               | 789 | Harlan        | ~7 wks | hES-endoderm P0 | N | 50 | syringe    |  |  |  |
| 14               | 790 | Harlan        | ~7 wks | hES-endoderm P0 | N | 50 | syringe    |  |  |  |
| 15               | 797 | Harlan        | ~7 wks | hES-endoderm P0 | N | 50 | syringe    |  |  |  |
| 16               | 798 | Harlan        | ~7 wks | hES-endoderm P0 | N | 50 | syringe    |  |  |  |
| <b>Endo P3 1</b> | 744 | Charles River | ~7 wks | hES-endoderm P3 | N | 60 | syringe    |  |  |  |
| 2                | 753 | Charles River | ~7 wks | hES-endoderm P3 | N | 60 | syringe    |  |  |  |
| 3                | 785 | Harlan        | ~7 wks | hES-endoderm P3 | N | 60 | syringe    |  |  |  |
| 4                | 791 | Harlan        | ~7 wks | hES-endoderm P3 | N | 60 | syringe    |  |  |  |
| 5                | 792 | Harlan        | ~7 wks | hES-endoderm P3 | N | 60 | syringe    |  |  |  |
| 6                | 793 | Harlan        | ~7 wks | hES-endoderm P3 | N | 60 | syringe    |  |  |  |
| 7                | 794 | Harlan        | ~7 wks | hES-endoderm P3 | N | 60 | syringe    |  |  |  |
| 8                | 795 | Harlan        | ~7 wks | hES-endoderm P3 | N | 60 | syringe    |  |  |  |
| 9                | 796 | Harlan        | ~7 wks | hES-endoderm P3 | N | 60 | syringe    |  |  |  |
| <b>Pdx1 P5 1</b> | 807 | Harlan        | ~7 wks | hES-endoderm P5 | N | 50 | syringe    |  |  |  |
| 2                | 892 | Harlan        | ~7 wks | hES-endoderm P5 | N | 50 | syringe    |  |  |  |
| 3                | 894 | Harlan        | ~7 wks | hES-endoderm P5 | N | 50 | syringe    |  |  |  |
| 4                | 811 | Harlan        | ~7 wks | hES-endoderm P5 | N | 50 | syringe    |  |  |  |
| 5                | 812 | Harlan        | ~7 wks | hES-endoderm P5 | N | 50 | syringe    |  |  |  |
| 6                | 813 | Harlan        | ~7 wks | hES-endoderm P5 | N | 50 | syringe    |  |  |  |
| 7                | 814 | Harlan        | ~7 wks | hES-endoderm P5 | N | 50 | syringe    |  |  |  |
| <b>Endo P6 1</b> | 903 | Harlan        | ~7 wks | hES-endoderm P6 | N | 50 | syringe    |  |  |  |
| 2                | 904 | Harlan        | ~7 wks | hES-endoderm P6 | N | 50 | syringe    |  |  |  |
| 3                | 905 | Harlan        | ~7 wks | hES-endoderm P6 | N | 50 | syringe    |  |  |  |
| 4                | 906 | Harlan        | ~7 wks | hES-endoderm P6 | N | 50 | syringe    |  |  |  |
| 5                | 907 | Harlan        | ~7 wks | hES-endoderm P6 | N | 50 | syringe    |  |  |  |
| 6                | 908 | Harlan        | ~7 wks | hES-endoderm P6 | N | 50 | syringe    |  |  |  |
| 7                | 909 | Harlan        | ~7 wks | hES-endoderm P6 | N | 50 | syringe    |  |  |  |
| 8                | 808 | Harlan        | ~ wks  | hES-endoderm P6 | N | 50 | syringe    |  |  |  |
| 9                | 911 | Harlan        | ~7 wks | hES-endoderm P6 | N | 50 | syringe    |  |  |  |
| 10               | 912 | Harlan        | ~7 wks | hES-endoderm P6 | N | 50 | syringe    |  |  |  |
| 11               | 913 | Harlan        | ~7 wks | hES-endoderm P6 | N | 50 | syringe    |  |  |  |
| 12               | 914 | Harlan        | ~7 wks | hES-endoderm P6 | N | 50 | syringe    |  |  |  |
| 13               | 917 | Charles River | ~7 wks | hES-endoderm P6 | N | 50 | syringe    |  |  |  |
| 14               | 919 | Charles River | ~7 wks | hES-endoderm P6 | N | 50 | syringe    |  |  |  |
| 15               | 920 | Charles River | ~7 wks | hES-endoderm P6 | N | 50 | syringe    |  |  |  |
| 16               | 921 | Charles River | ~7 wks | hES-endoderm P6 | N | 50 | syringe    |  |  |  |
| 17               | 922 | Charles River | ~7 wks | hES-endoderm P6 | N | 50 | syringe    |  |  |  |
| 18               | 923 | Charles River | ~7 wks | hES-endoderm P6 | N | 50 | syringe    |  |  |  |
| 19               | 928 | Charles River | ~7 wks | hES-endoderm P6 | N | 50 | syringe    |  |  |  |
| 20               | 929 | Charles River | ~7 wks | hES-endoderm P6 | N | 50 | syringe    |  |  |  |
| 21               | 930 | Charles River | ~7 wks | hES-endoderm P6 | N | 50 | syringe    |  |  |  |
| <b>Endo P7 1</b> | 932 | Harlan        | ~7 wks | hES-endoderm P7 | N | 50 | syringe    |  |  |  |
| 2                | 933 | Harlan        | ~7 wks | hES-endoderm P7 | N | 50 | syringe    |  |  |  |
| 3                | 934 | Harlan        | ~7 wks | hES-endoderm P7 | N | 50 | syringe    |  |  |  |
| 4                | 935 | Harlan        | ~7 wks | hES-endoderm P7 | N | 50 | syringe    |  |  |  |
| 5                | 936 | Harlan        | ~7 wks | hES-endoderm P7 | N | 50 | syringe    |  |  |  |
| 6                | 937 | Harlan        | ~7 wks | hES-endoderm P7 | N | 50 | syringe    |  |  |  |
| 7                | 938 | Harlan        | ~7 wks | hES-endoderm P7 | N | 50 | syringe    |  |  |  |
| 8                | 939 | Harlan        | ~7 wks | hES-endoderm P7 | N | 50 | syringe    |  |  |  |
| 9                | 941 | Harlan        | ~7 wks | hES-endoderm P7 | N | 50 | syringe    |  |  |  |

|                  |             |               |         |                           |   |    |         |     |       |       |
|------------------|-------------|---------------|---------|---------------------------|---|----|---------|-----|-------|-------|
| <b>Ngn3 P0 1</b> | 931         | Harlan        | ~7 wks  | hES-Ngn3 P0               | N | 50 | syringe |     |       |       |
| <b>2</b>         | unmarked    | Harlan        | ~7 wks  | hES-Ngn3 P0               | N | 50 | syringe |     |       |       |
| <b>3</b>         | unmarked 2  | Harlan        | ~7 wks  | hES-Ngn3 P0               | N | 50 | syringe |     |       |       |
| <b>4</b>         | unmarked 4  | Harlan        | ~7 wks  | hES-Ngn3 P0               | N | 50 | syringe |     |       |       |
| <b>5</b>         | unmarked 6  | Harlan        | ~7 wks  | hES-Ngn3 P0               | N | 50 | syringe |     |       |       |
| <b>6</b>         | unmarked 8  | Harlan        | ~7 wks  | hES-Ngn3 P0               | N | 50 | syringe |     |       |       |
| <b>Ngn3 P5 1</b> | 962         | Harlan        | ~7 wks  | hES-Ngn3 P5               | N | 50 | syringe |     |       |       |
| <b>2</b>         | 963         | Harlan        | ~7 wks  | hES-Ngn3 P5               | N | 50 | syringe |     |       |       |
| <b>3</b>         | 964         | Harlan        | ~7 wks  | hES-Ngn3 P5               | N | 50 | syringe |     |       |       |
| <b>4</b>         | 967         | Harlan        | ~7 wks  | hES-Ngn3 P5               | N | 50 | syringe |     |       |       |
| <b>5</b>         | 969         | Harlan        | ~7 wks  | hES-Ngn3 P5               | N | 50 | syringe |     |       |       |
| <b>6</b>         | 970         | Harlan        | ~7 wks  | hES-Ngn3 P5               | N | 50 | syringe |     |       |       |
| <b>7</b>         | 975         | Harlan        | ~7 wks  | hES-Ngn3 P5               | N | 50 | syringe |     |       |       |
| <b>8</b>         | unmarked 7  | Harlan        | ~7 wks  | hES-Ngn3 P5               | N | 50 | syringe |     |       |       |
| <b>Pdx1 P0 1</b> | 984         | Harlan        | ~7 wks  | hES-Pdx1 P0               | N | 50 | syringe |     |       |       |
| <b>2</b>         | 985         | Harlan        | ~7 wks  | hES-Pdx1 P0               | N | 50 | syringe |     |       |       |
| <b>3</b>         | 986         | Harlan        | ~7 wks  | hES-Pdx1 P0               | N | 50 | syringe | Yes |       |       |
| <b>4</b>         | 987         | Harlan        | ~7 wks  | hES-Pdx1 P0               | N | 50 | syringe |     |       |       |
| <b>5</b>         | 988         | Harlan        | ~7 wks  | hES-Pdx1 P0               | N | 50 | syringe | Yes |       |       |
| <b>6</b>         | 989         | Harlan        | ~7 wks  | hES-Pdx1 P0               | N | 50 | syringe | Yes | 48.0  | 169.0 |
| <b>7</b>         | 990         | Harlan        | ~7 wks  | hES-Pdx1 P0               | N | 50 | syringe |     |       |       |
| <b>8</b>         | 992         | Harlan        | ~7 wks  | hES-Pdx1 P0               | N | 50 | syringe | Yes |       |       |
| <b>9</b>         | 993         | Harlan        | ~7 wks  | hES-Pdx1 P0               | N | 50 | syringe | Yes | 51.5  | 249.7 |
| <b>10</b>        | 994         | Harlan        | ~7 wks  | hES-Pdx1 P0               | N | 50 | syringe |     |       |       |
| <b>11</b>        | 995         | Harlan        | ~7 wks  | hES-Pdx1 P0               | N | 50 | syringe |     |       |       |
| <b>12</b>        | 996         | Harlan        | ~7 wks  | hES-Pdx1 P0               | N | 50 | syringe | Yes | 64.4  | 149.6 |
| <b>13</b>        | 949         | Harlan        | ~7 wks  | hES-Pdx1 P0               | N | 50 | syringe |     |       |       |
| <b>14</b>        | 950         | Harlan        | ~7 wks  | hES-Pdx1 P0               | N | 50 | syringe |     |       |       |
| <b>15</b>        | 952         | Harlan        | ~7 wks  | hES-Pdx1 P0               | N | 50 | syringe |     |       |       |
| <b>16</b>        | 953         | Harlan        | ~7 wks  | hES-Pdx1 P0               | N | 50 | syringe |     |       |       |
| <b>17</b>        | 943         | Harlan        | ~7 wks  | hES-Pdx1 P0               | N | 50 | syringe |     |       |       |
| <b>18</b>        | 954         | Harlan        | ~7 wks  | hES-Pdx1 P0               | N | 50 | syringe |     |       |       |
| <b>19</b>        | 955         | Harlan        | ~7 wks  | hES-Pdx1 P0               | N | 50 | syringe |     |       |       |
| <b>Pdx1 P4 1</b> | 942         | Harlan        | ~7 wks  | hES-Pdx1 P4               | N | 50 | syringe | Yes | 79.3  | 285.4 |
| <b>2</b>         | 944         | Harlan        | ~7 wks  | hES-Pdx1 P4               | N | 50 | syringe | Yes |       |       |
| <b>3</b>         | 945         | Harlan        | ~7 wks  | hES-Pdx1 P4               | N | 50 | syringe | Yes | 63.3  | 240.0 |
| <b>4</b>         | 946         | Harlan        | ~7 wks  | hES-Pdx1 P4               | N | 50 | syringe |     |       |       |
| <b>5</b>         | 947         | Harlan        | ~7 wks  | hES-Pdx1 P4               | N | 50 | syringe | Yes |       |       |
| <b>6</b>         | 948         | Harlan        | ~7 wks  | hES-Pdx1 P4               | N | 50 | syringe | Yes |       |       |
| <b>Pdx1 P6 1</b> | 977         | Harlan        | ~7 wks  | hES-Pdx1 P6               | N | 50 | syringe |     |       |       |
| <b>2</b>         | 979         | Harlan        | ~7 wks  | hES-Pdx1 P6               | N | 50 | syringe |     |       |       |
| <b>3</b>         | 980         | Harlan        | ~7 wks  | hES-Pdx1 P6               | N | 50 | syringe |     |       |       |
| <b>4</b>         | 981         | Harlan        | ~7 wks  | hES-Pdx1 P6               | N | 50 | syringe |     |       |       |
| <b>Pdx1 P7 1</b> | 957         | Harlan        | ~7 wks  | hES-Pdx1 P7               | N | 50 | syringe | Yes | 116.2 | 228.5 |
| <b>2</b>         | 961         | Harlan        | ~7 wks  | hES-Pdx1 P7               | N | 50 | syringe | Yes |       |       |
| <b>Islets1</b>   | 741         | Charles River | ~7 wks  | human islets from donor 1 | Y | 50 | syringe |     |       |       |
| <b>2</b>         | 743         | Charles River | ~7 wks  | human islets from donor 1 | Y | 50 | syringe |     |       |       |
| <b>3</b>         | 745         | Charles River | ~7 wks  | human islets from donor 1 | Y | 50 | syringe |     |       |       |
| <b>4</b>         | 747         | Charles River | ~7 wks  | human islets from donor 1 | Y | 50 | syringe |     |       |       |
| <b>5</b>         | 751         | Charles River | ~7 wks  | human islets from donor 1 | Y | 50 | syringe |     |       |       |
| <b>6</b>         | 754         | Charles River | ~7 wks  | human islets from donor 1 | Y | 50 | syringe | Yes |       |       |
| <b>7</b>         | 756         | Charles River | ~7 wks  | human islets from donor 1 | Y | 50 | syringe |     |       |       |
| <b>8</b>         | 757         | Charles River | ~7 wks  | human islets from donor 1 | Y | 50 | syringe |     |       |       |
| <b>9</b>         | 764         | Charles River | ~7 wks  | human islets from donor 1 | Y | 50 | syringe |     |       |       |
| <b>10</b>        | 767         | Charles River | ~7 wks  | human islets from donor 1 | Y | 50 | syringe |     |       |       |
| <b>11</b>        | 800         | Harlan        | ~7 wks  | human islets from donor 2 | N | 60 | syringe |     |       |       |
| <b>12</b>        | 802         | Harlan        | ~7 wks  | human islets from donor 2 | N | 60 | syringe | Yes | 28.0  | 264.9 |
| <b>13</b>        | 804         | Harlan        | ~7 wks  | human islets from donor 2 | N | 60 | syringe |     |       |       |
| <b>14</b>        | 805         | Harlan        | ~7 wks  | human islets from donor 2 | N | 60 | syringe |     |       |       |
| <b>15</b>        | 806         | Harlan        | ~7 wks  | human islets from donor 2 | N | 60 | syringe |     |       |       |
| <b>16</b>        | 815         | Harlan        | ~7 wks  | human islets from donor 3 | N | 50 | syringe | Yes | 93.4  | 226.8 |
| <b>17</b>        | 820         | Harlan        | ~7 wks  | human islets from donor 3 | N | 50 | syringe | Yes | 261.2 | 401.6 |
| <b>18</b>        | 972         | Harlan        | ~ 7 wks | human islets from donor 3 | N | 50 | syringe | Yes | 198.2 | 544.3 |
| <b>19</b>        | unmarked #5 | Harlan        | ~ 7 wks | human islets from donor 3 | N | 50 | syringe | Yes | 107.1 | 466.9 |

## REFERENCES

1. Borowiak, M. et al. Small molecules efficiently direct endodermal differentiation of mouse and human embryonic stem cells. *Cell Stem Cell* 4, 348-58 (2009).
